# Supplementary material for: Saponification Value of Fats and Oils as Determined from 1H-NMR Data: The Case of Dairy Fats
Source: MDPI journal article supplement (doi:10.3390/foods11101466), 2022-05-18
Supplement: s1 [file s1]

## Supplementary material

### 1. Reference intervals for resonance integration

Aiming to eliminate operator errors, fixed integration limits were used to obtain the integration values. In addition, the integrals of all F signals in the analyzed samples were calibrated to the value of 2,000, and the rest of the integrals were automatically calculated by the processing program (MestReNova, Mestrelab Research) accordingly. In Table S1, the intervals used to obtain the integrals are presented.

**Table S1.** Reference intervals for resonance integration

| Resonance* | $\delta$ , ppm |
|------------|----------------|
| (A+B)      | 0.75 – 0.99    |
| C          | 1.14 – 1.40    |
| D          | 1.47 – 1.72    |
| E          | 1.86 – 2.12    |
| F          | 2.12 – 2.37    |
| G          | 2.66 – 2.83    |
| H          | 3.95 – 4.35    |
| (I+J)      | 5.13 – 5.43    |

\* Letters A-J according to the assignment of  $^1\text{H}$ -NMR resonances presented in Table 1 and Figure 1.

### 2. Example of SV algorithm application

The calculation of the average molecular weight for the binary mixture RO-TB-20 (rapeseed oil - tributyrin 20%) is presented for example. The  $^1\text{H}$ -NMR values of the integrals are presented in Table S2.

**Table S2.**  $^1\text{H}$ -NMR integral values for RO-TB-20 sample

| $^1\text{H}$ -NMR integral values* |             |        |       |       |       |       |       |             |
|------------------------------------|-------------|--------|-------|-------|-------|-------|-------|-------------|
| Sample                             | $A_{(A+B)}$ | $A_C$  | $A_D$ | $A_E$ | $A_F$ | $A_G$ | $A_H$ | $A_{(I+J)}$ |
| RO-TB-20                           | 3.033       | 10.192 | 2.009 | 2.083 | 2     | 0.432 | 1.349 | 1.782       |

|                 |       |        |       |       |   |       |       |       |
|-----------------|-------|--------|-------|-------|---|-------|-------|-------|
| <b>RO-TB-20</b> | 3.033 | 10.192 | 2.009 | 2.083 | 2 | 0.432 | 1.349 | 1.782 |
|-----------------|-------|--------|-------|-------|---|-------|-------|-------|

\* Letters A-J according to the assignment of  $^1\text{H}$ -NMR resonances presented in Table 1 and Figure 1.

$$M = \frac{3}{2} \cdot \frac{10.192 + 2.009 + 2.083 + 2 + 0.432}{3.033} = 8.267$$

$$D = \frac{3}{2} \cdot \frac{1.782 - \frac{1.349}{4}}{3.033} = 0.715$$

$$n_C = 8.267 + 2 \cdot 0.715 + 1 = 10.696 \text{ (mean number of C atoms in the alkyl chain)}$$

$$n_H = 2 \cdot 8.267 + 2 \cdot 0.715 + 3 = 20.963 \text{ (mean number of H atoms in the alkyl chain)}$$

The mean number of carbon atoms ( $n_C$ ) and the average number of hydrogen atoms ( $n_H$ ) in the triacylglycerol are computed as:

$$n_{C(TAG)} = 6 + 3 \cdot 10.969 = 38.09$$

$$n_{H(TAG)} = 5 + 3 \cdot 20.963 = 67.89$$

The mean formulae of the triacylglycerols will result as  $\text{C}_{38.09}\text{H}_{67.89}\text{O}_6$ , with the corresponding molecular weight:

$$M_{TG} = 12 \cdot 38.09 + 1 \cdot 67.89 + 16 \cdot 6 = 620.949$$

SV calculations:

$$\nu = \frac{1}{M_{TAG}} = \frac{1}{620.949} = 1.61 \cdot 10^{-3} \text{ moles triacylglycerols/g fat}$$

$$\nu_{CO-O} = 3 \cdot \nu = 3 \cdot 1.61 \cdot 10^{-3} = 4.831 \cdot 10^{-3} \text{ moles ester groups/g fat}$$

$$SV = 3 \cdot \nu \cdot 56 \cdot 10^3 = 4.831 \cdot 10^{-3} \cdot 56 \cdot 10^3 = 271 \text{ mg KOH/g fat}$$

### 3. Assessment of the method accuracy

The accuracy of the new method was assessed by calculating for each sample the SV (NMR) deviation from the SV (ISO), taken as a reference and expressed as percentages relative to

the SV (ISO) (see details in Table S2). The mean percent deviation of SV (NMR) from SV (ISO) was found 2.3%, which stands for a robust NMR algorithm.

**Table S3.** Assessment of the accuracy of the NMR method

| Series       | Sample    | SV (NMR) | SV (ISO) | Deviation            | % Dev. against | % Dev. as a     |
|--------------|-----------|----------|----------|----------------------|----------------|-----------------|
|              |           |          |          | SV(NMR) from SV(ISO) | SV (ISO)       | module          |
|              |           |          |          | (5)=(3)-(4)          | (6)= (5)       | (7)=(6)×100/(4) |
| (1)          | (2)       | (3)      | (4)      | (5)                  | (6)            | (7)             |
| SO-TB series | SO-TB-0   | 196      | 190      | 6                    | 6              | 3.2             |
|              | SO-TB-10  | 230      | 225      | 5                    | 5              | 2.2             |
|              | SO-TB-20  | 266      | 274      | -8                   | 8              | 2.9             |
|              | SO-TB-30  | 302      | 294      | 8                    | 8              | 2.7             |
|              | SO-TB-40  | 345      | 336      | 9                    | 9              | 2.7             |
|              | SO-TB-50  | 387      | 374      | 13                   | 13             | 3.5             |
|              | SO-TB-60  | 412      | 403      | 9                    | 9              | 2.2             |
|              | SO-TB-70  | 447      | 434      | 13                   | 13             | 3.0             |
|              | SO-TB-80  | 492      | 480      | 12                   | 12             | 2.5             |
|              | SO-TB-90  | 535      | 530      | 5                    | 5              | 0.9             |
|              | SO-TB-100 | 559      | 547      | 12                   | 12             | 2.2             |
|              | SO-TB-15  | 250      | 241      | 9                    | 9              | 3.7             |
|              | SO-TB-35  | 326      | 318      | 8                    | 8              | 2.5             |
|              | SO-TB-55  | 413      | 403      | 10                   | 10             | 2.5             |
|              | SO-TB-75  | 467      | 477      | -10                  | 10             | 2.1             |
|              | SO-TB-95  | 540      | 527      | 13                   | 13             | 2.5             |
| RO-TB series | RO-TB-0   | 196      | 192      | 4                    | 4              | 2.1             |
|              | RO-TB-10  | 233      | 227      | 6                    | 6              | 2.6             |
|              | RO-TB-20  | 272      | 266      | 6                    | 6              | 2.3             |
|              | RO-TB-30  | 305      | 312      | -7                   | 7              | 2.2             |
|              | RO-TB-40  | 341      | 334      | 7                    | 7              | 2.1             |
|              | RO-TB-50  | 378      | 367      | 11                   | 11             | 3.0             |
|              | RO-TB-60  | 414      | 411      | 3                    | 3              | 0.7             |
|              | RO-TB-70  | 448      | 433      | 15                   | 15             | 3.5             |
|              | RO-TB-80  | 486      | 474      | 12                   | 12             | 2.5             |
|              | RO-TB-90  | 523      | 515      | 8                    | 8              | 1.6             |
|              | RO-TB-100 | 560      | 551      | 9                    | 9              | 1.6             |
|              | RO-TB-5   | 215      | 211      | 4                    | 4              | 1.9             |
|              | RO-TB-25  | 286      | 292      | -6                   | 6              | 2.1             |
|              | RO-TB-45  | 359      | 350      | 9                    | 9              | 2.6             |
|              | RO-TB-65  | 429      | 435      | -6                   | 6              | 1.4             |
|              | RO-TB-85  | 503      | 499      | 4                    | 4              | 0.8             |

#### 4. Influence of various delays on the calculated SV

The influence of various delays on the calculated SV has been checked on a rapeseed oil sample. The corresponding integral values and the calculated SV are presented in Table S4.

**Table S4.** Influence of various delays on the calculated SV\*

| <b>D1</b><br><b>[sec]</b> | <b>Int. A+B</b> | <b>Int. C</b> | <b>Int. D</b> | <b>Int. E</b> | <b>Int. F</b> | <b>Int. G</b> | <b>Int. H</b> | <b>Int. I+J</b> | <b>SV</b> | <b>SV (formatted)</b> |
|---------------------------|-----------------|---------------|---------------|---------------|---------------|---------------|---------------|-----------------|-----------|-----------------------|
| <b>0.5</b>                | 100.000         | 576.407       | 64.286        | 115.278       | 62.965        | 22.717        | 41.797        | 89.619          | 199.79    | <b>200</b>            |
| <b>1</b>                  | 100.000         | 575.227       | 64.077        | 115.015       | 62.824        | 22.674        | 41.619        | 89.555          | 200.07    | <b>200</b>            |
| <b>2</b>                  | 100.000         | 572.998       | 63.741        | 114.543       | 62.517        | 22.558        | 41.416        | 89.313          | 200.65    | <b>201</b>            |
| <b>3</b>                  | 100.000         | 575.057       | 64.226        | 115.098       | 62.854        | 22.725        | 41.693        | 89.722          | 200.01    | <b>200</b>            |
| <b>4</b>                  | 100.000         | 572.986       | 63.871        | 114.640       | 62.553        | 22.603        | 41.513        | 89.440          | 200.57    | <b>201</b>            |
| <b>5</b>                  | 100.000         | 573.870       | 64.041        | 114.849       | 62.702        | 22.667        | 41.595        | 89.616          | 200.31    | <b>200</b>            |
| <b>6</b>                  | 100.000         | 573.073       | 63.909        | 114.687       | 62.583        | 22.626        | 41.526        | 89.515          | 200.52    | <b>201</b>            |
| <b>7</b>                  | 100.000         | 572.161       | 63.739        | 114.481       | 62.448        | 22.574        | 41.453        | 89.377          | 200.78    | <b>201</b>            |
| <b>8</b>                  | 100.000         | 572.289       | 63.771        | 114.505       | 62.459        | 22.578        | 41.462        | 89.406          | 200.74    | <b>201</b>            |
| <b>9</b>                  | 100.000         | 572.123       | 63.753        | 114.474       | 62.450        | 22.571        | 41.458        | 89.386          | 200.78    | <b>201</b>            |
| <b>10</b>                 | 100.000         | 572.732       | 63.863        | 114.622       | 62.533        | 22.609        | 41.501        | 89.486          | 200.61    | <b>201</b>            |
| <b>11</b>                 | 100.000         | 571.866       | 63.719        | 114.401       | 62.403        | 22.547        | 41.422        | 89.355          | 200.85    | <b>201</b>            |
| <b>12</b>                 | 100.000         | 572.864       | 63.912        | 114.656       | 62.567        | 22.623        | 41.518        | 89.522          | 200.56    | <b>201</b>            |
| <b>13</b>                 | 100.000         | 572.814       | 63.882        | 114.643       | 62.562        | 22.617        | 41.512        | 89.510          | 200.58    | <b>201</b>            |
| <b>14</b>                 | 100.000         | 571.757       | 63.698        | 114.397       | 62.389        | 22.554        | 41.424        | 89.343          | 200.88    | <b>201</b>            |
| <b>15</b>                 | 100.000         | 572.801       | 63.870        | 114.650       | 62.562        | 22.626        | 41.515        | 89.513          | 200.58    | <b>201</b>            |
| <b>16</b>                 | 100.000         | 572.147       | 63.787        | 114.491       | 62.468        | 22.583        | 41.458        | 89.413          | 200.76    | <b>201</b>            |
| <b>18</b>                 | 100.000         | 571.397       | 63.639        | 114.295       | 62.340        | 22.519        | 41.386        | 89.282          | 200.98    | <b>201</b>            |
| <b>20</b>                 | 100.000         | 571.898       | 63.733        | 114.444       | 62.428        | 22.563        | 41.440        | 89.371          | 200.83    | <b>201</b>            |
| <b>24</b>                 | 100.000         | 573.327       | 63.994        | 114.758       | 62.655        | 22.650        | 41.554        | 89.610          | 200.42    | <b>200</b>            |
| <b>60</b>                 | 100.000         | 572.701       | 63.857        | 114.590       | 62.545        | 22.598        | 41.496        | 89.502          | 200.61    | <b>201</b>            |
| <b>120</b>                | 100.000         | 572.135       | 63.753        | 114.461       | 62.445        | 22.564        | 41.459        | 89.407          | 200.78    | <b>201</b>            |

\* Letters A-J according to the assignment of <sup>1</sup>H-NMR resonances presented in Table 1 and Figure 1.
